# Supplementary material for: Water splitting and CO2 reduction over an AgSr2Ta5O15 photocatalyst developed by a valence band control strategy
Source: Royal Society of Chemistry journal article supplement (doi:10.1039/d3cc01481a), 2023-01-01
Supplement: d3cc01481a1.pdf [file d3cc01481a1.pdf]

## Supporting Information

### Water Splitting and CO<sub>2</sub> Reduction over AgSr<sub>2</sub>Ta<sub>5</sub>O<sub>15</sub> Photocatalyst Developed by Valence Band Control Strategy

Tomoaki Takayama,<sup>a, b</sup> Akihide Iwase,<sup>a, c</sup> Akihiko Kudo<sup>a, d\*</sup>

---

<sup>a</sup> Department of Applied Chemistry, Faculty of Science, Tokyo University of Science, 1-3 Kagurazaka, Shinjuku-ku, Tokyo 162-8601, Japan.

<sup>b</sup> His current affiliation is Graduate School of Science and Technology, Division of Materials Science, Nara Institute of Science and Technology, 8916-5 Takayama, Ikoma, Nara 630-0192, Japan.

<sup>c</sup> His current affiliation is Department of Applied Chemistry, School of Science and Technology, Meiji University, Kanagawa 214-8571, Japan.

<sup>d</sup> Tokyo University of Science, Research Institute of Science and Technology, Carbon Value Research Center, Japan.

The corresponding author (\*): [a-kudo@rs.tus.ac.jp](mailto:a-kudo@rs.tus.ac.jp)

## Experiments

### Preparation of AgSr<sub>2</sub>Ta<sub>5</sub>O<sub>15</sub> and NaSr<sub>2</sub>Ta<sub>5</sub>O<sub>15</sub>

AgSr<sub>2</sub>Ta<sub>5</sub>O<sub>15</sub> was prepared by a conventional solid-state reaction. The starting materials are summarized as follows; Ag<sub>2</sub>O (Kanto Chemical; 99.0%), Ta<sub>2</sub>O<sub>5</sub> (Rare Metallic; 99.99%), SrCO<sub>3</sub> (Kanto Chemical; 99.9%). For AgSr<sub>2</sub>Ta<sub>5</sub>O<sub>15</sub>, Ag<sub>2</sub>O, Ta<sub>2</sub>O<sub>5</sub>, and SrCO<sub>3</sub> were mixed using an alumina mortar. The amount of Ag<sub>2</sub>O was 5% excess as compared to the stoichiometric ratio. The mixture was calcined at 1173 K for 1 h in an alumina crucible, followed by grinding the calcined sample. This calcined sample was further calcined at 1423 K for 10 h to obtain powdered AgSr<sub>2</sub>Ta<sub>5</sub>O<sub>15</sub> sample. If necessary, the obtained AgSr<sub>2</sub>Ta<sub>5</sub>O<sub>15</sub> was treated using an aqueous HNO<sub>3</sub> solution to remove the excess Ag component. Afterward, the treated AgSr<sub>2</sub>Ta<sub>5</sub>O<sub>15</sub> was additionally washed with water until the pH of the supernatant solution reached neutral. NaSr<sub>2</sub>Ta<sub>5</sub>O<sub>15</sub> of a reference sample was prepared by a polymerized complex method according to the literature.<sup>1</sup> Cocatalysts of Ag and NiO were loaded by impregnation. AgNO<sub>3</sub> (Tanaka Kikinzoku) and Ni(NO<sub>3</sub>)<sub>2</sub>•6H<sub>2</sub>O (Wako Pure Chemical; 98.5%) were used as the cocatalyst sources. Water was employed as the solvent of the AgNO<sub>3</sub> and Ni(NO<sub>3</sub>)<sub>2</sub> salts. After the solution contained with either of salts was dropped into the AgSr<sub>2</sub>Ta<sub>5</sub>O<sub>15</sub> or NaSr<sub>2</sub>Ta<sub>5</sub>O<sub>15</sub> powder, the obtained slurry was placed on a boiling water bath for drying off the water. Afterward, the powder impregnated with either of salts was heated at 723 K for 1 h, and 573 K for 1 h, respectively, in a muffle furnace to load the Ag and NiO cocatalysts.

### Characterization

Crystal structures of AgSr<sub>2</sub>Ta<sub>5</sub>O<sub>15</sub> and NaSr<sub>2</sub>Ta<sub>5</sub>O<sub>15</sub> were identified by X-ray diffraction (XRD: Rigaku; MiniFlex (Cu K $\alpha$ )). Their diffuse reflectance spectra were obtained using the Kubelka-Munk method (DRS: Jasco; V-570). Particle shapes of AgSr<sub>2</sub>Ta<sub>5</sub>O<sub>15</sub> and NaSr<sub>2</sub>Ta<sub>5</sub>O<sub>15</sub> were observed using a scanning electron microscope (SEM: JEOL; JSM-7600F).

### Computational condition

Density functional theory (DFT) calculations were performed using the CASTEP code<sup>2</sup> to obtain band structures of AgSr<sub>2</sub>Ta<sub>5</sub>O<sub>15</sub> and NaSr<sub>2</sub>Ta<sub>5</sub>O<sub>15</sub>. The Vanderbilt-type ultrasoft pseudopotentials,<sup>3</sup> the generalized gradient approximation (GGA)<sup>4</sup> and the Perdew-Burke-Ernzerh of exchange-correlation functional (PBE)<sup>5</sup> were employed in periodic boundary conditions. Checking the calculation convergence for the geometry optimizations, 500 eV of cut-off energy was employed as optimal parameter. The detailed history for the parameter optimization is shown in Figures S2–S4, and Table S1. The reciprocal space was sampled using a *k*-point mesh with a typical spacing of 0.07 Å<sup>-1</sup>, as generated by the Monkhorst-Pack scheme.<sup>6</sup> Geometry optimizations of the supercells were conducted using the limited-memory Broyden-Fletcher-Goldfarb-Shanno (LBFGS) algorithm.<sup>7</sup> Convergence criteria are summarized as follows; (1) self-consistent field tolerance:  $2.0 \times 10^{-6}$  eV per atom; (2) energy tolerance:  $2.0 \times 10^{-5}$  eV per atom; (3) maximum force tolerance: 0.05 eV Å<sup>-1</sup>, and (4) maximum displacement tolerance:  $2.0 \times 10^{-3}$  Å; (5) maximum stress: 0.1 GPa. Projected densities of states (DOS) for various orbitals were calculated using the optimized bulk models and HSE06 that well reproduces experimental band gaps.<sup>8–10</sup> Gaussian broadening of 0.20 eV was applied for plotting the DOS. In DOS calculations, the reciprocal space was sampled using a *k*-point mesh with a typical spacing of 0.04 Å<sup>-1</sup>. Cartesian coordinates of the crystal structure of NaSr<sub>2</sub>Ta<sub>5</sub>O<sub>15</sub> provided from the inorganic database<sup>11</sup> was

employed as the initial structure for the DFT calculation. The crystal structure of  $\text{NaSr}_2\text{Ta}_5\text{O}_{15}$  was altered to satisfy the condition for the DFT calculation (Figure S1). For  $\text{AgSr}_2\text{Ta}_5\text{O}_{15}$ , its initial structure was generated by replacement of the Na sites of  $\text{NaSr}_2\text{Ta}_5\text{O}_{15}$  with Ag. XRD simulations were performed using the optimized structures with X-ray of Cu  $K\alpha$  and plot step of  $0.01^\circ$ .

### **Photocatalytic Reaction**

Photocatalytic  $\text{CO}_2$  reduction and water splitting were conducted using a gas-flow system equipped with an inner irradiation cell made of quartz or Pyrex, and a 400 W high-pressure mercury lamp. Photocatalysts were dispersed in water.  $\text{NaHCO}_3$  was added into the aqueous solution, if necessary.  $\text{CO}_2$  or Ar gas was continually supplied into the aqueous suspension. The amounts of gaseous products were determined by gas-chromatographs (Shimadzu, GC-8A; TCD, MS-5A, Ar carrier; FID, MS-13X, a methanizer,  $\text{N}_2$  carrier).

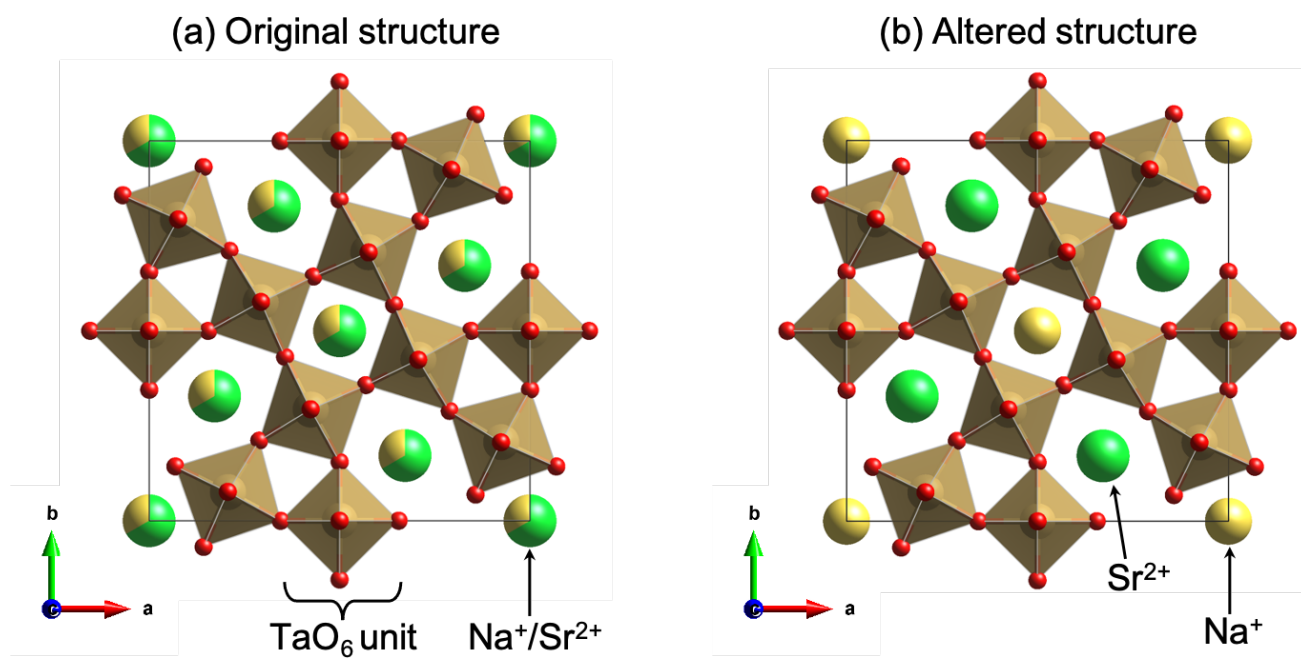

**Figure S1.** Crystal structures of (a) original NaSr<sub>2</sub>Ta<sub>5</sub>O<sub>15</sub> structure obtained from the database,<sup>11</sup> and (b) altered NaSr<sub>2</sub>Ta<sub>5</sub>O<sub>15</sub> structure for DFT calculation. These illustrations were drawn by VESTA software.<sup>12</sup>

**Table S1.** Lattice parameters of NaSr<sub>2</sub>Ta<sub>5</sub>O<sub>15</sub> and AgSr<sub>2</sub>Ta<sub>5</sub>O<sub>15</sub> before/after geometry optimization using DFT calculations.

| Material                                          | Cut-off<br>/ eV | Lattice parameters |       |       |              |             |              |
|---------------------------------------------------|-----------------|--------------------|-------|-------|--------------|-------------|--------------|
|                                                   |                 | a / Å              | b / Å | c / Å | $\alpha$ / ° | $\beta$ / ° | $\gamma$ / ° |
| NaSr <sub>2</sub> Ta <sub>5</sub> O <sub>15</sub> | initial         | 12.383             | =a    | 3.861 | 90.000       | = $\alpha$  | = $\alpha$   |
|                                                   | 400             | 12.974             | =a    | 4.101 | 90.000       | = $\alpha$  | = $\alpha$   |
|                                                   | 500             | 12.963             | =a    | 4.099 | 90.000       | = $\alpha$  | = $\alpha$   |
|                                                   | 600             | 12.973             | =a    | 4.101 | 90.000       | = $\alpha$  | = $\alpha$   |
| AgSr <sub>2</sub> Ta <sub>5</sub> O <sub>15</sub> | 400             | 12.991             | =a    | 4.098 | 90.000       | = $\alpha$  | = $\alpha$   |
|                                                   | 500             | 12.974             | =a    | 4.095 | 90.000       | = $\alpha$  | = $\alpha$   |
|                                                   | 600             | 12.977             | =a    | 4.094 | 90.000       | = $\alpha$  | = $\alpha$   |

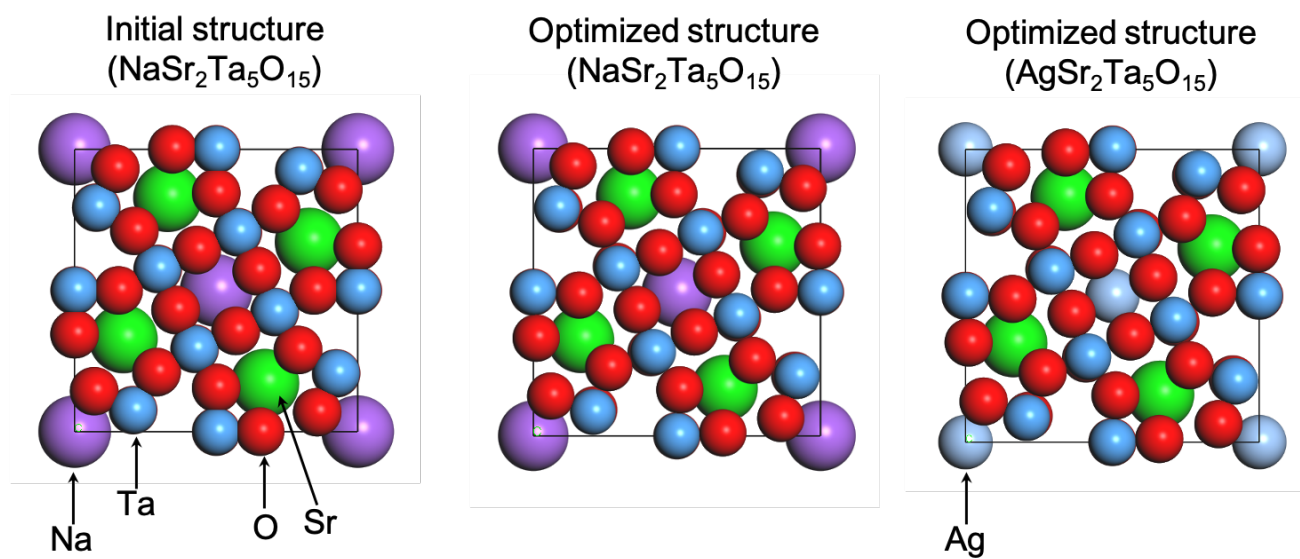

**Figure S2.** Crystal structures of initial  $\text{NaSr}_2\text{Ta}_5\text{O}_{15}$  structure obtained from the database,<sup>11</sup> and optimized  $\text{NaSr}_2\text{Ta}_5\text{O}_{15}$  and  $\text{AgSr}_2\text{Ta}_5\text{O}_{15}$  structures. Constituent elements are displayed with their element symbols. Black solid lines indicate the periodic boundary.

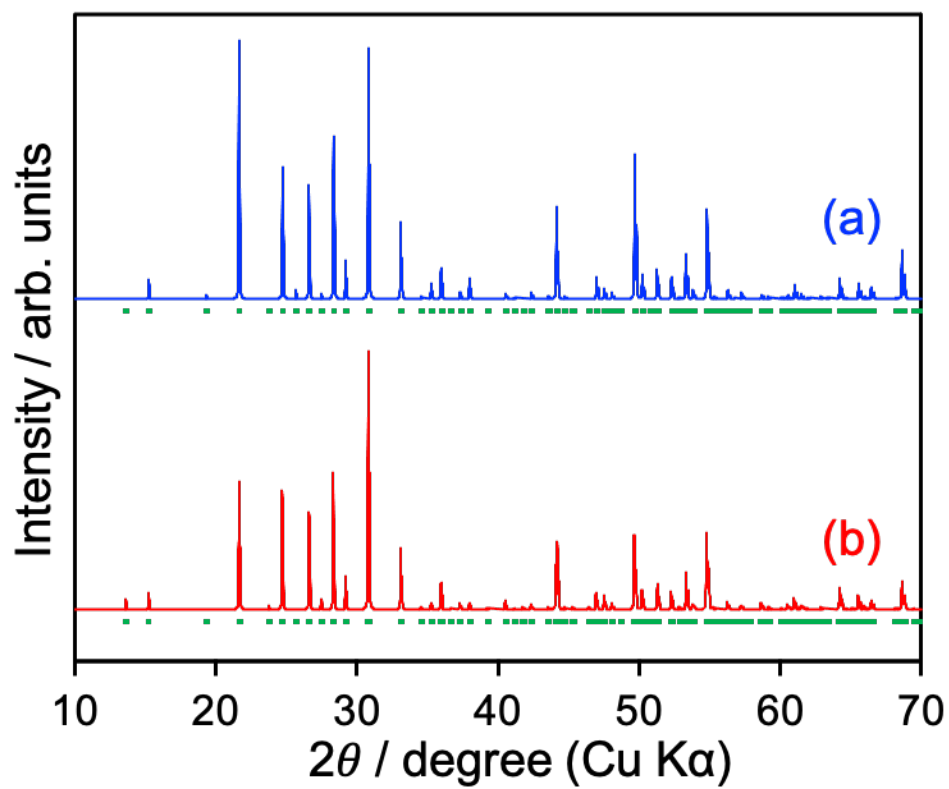

**Figure S3.** Simulated XRD patterns of (a)  $\text{NaSr}_2\text{Ta}_5\text{O}_{15}$  and (b)  $\text{AgSr}_2\text{Ta}_5\text{O}_{15}$  after geometry optimization. Green plots indicate their diffraction positions. Steps are  $0.01^\circ$ .

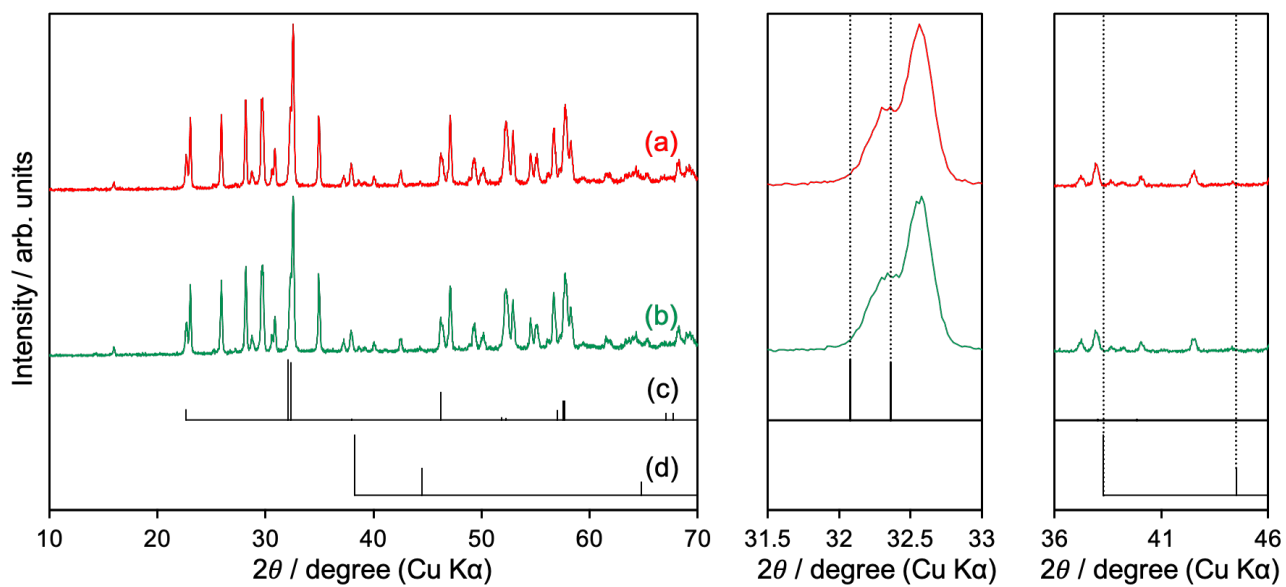

**Figure S4.** XRD patterns of AgSr<sub>2</sub>Ta<sub>5</sub>O<sub>15</sub> (a) without HNO<sub>3</sub> treatment and (b) with HNO<sub>3</sub> treatment, and PDFs of (c) AgTaO<sub>3</sub> (PDF No.: 1-72-1383) and (d) Ag (PDF No.: 1-71-4612).

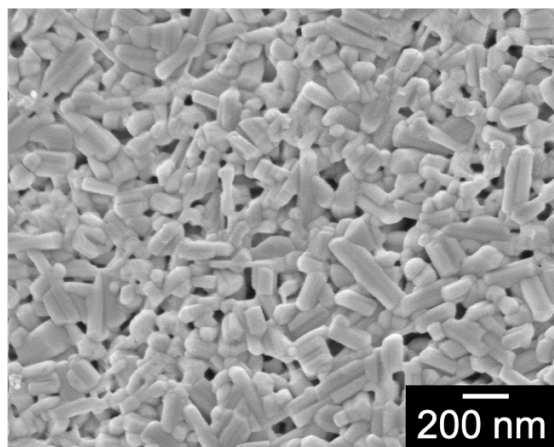

**Figure S5** SEM image of  $\text{NaSr}_2\text{Ta}_5\text{O}_{15}$  prepared by a polymerized complex method.

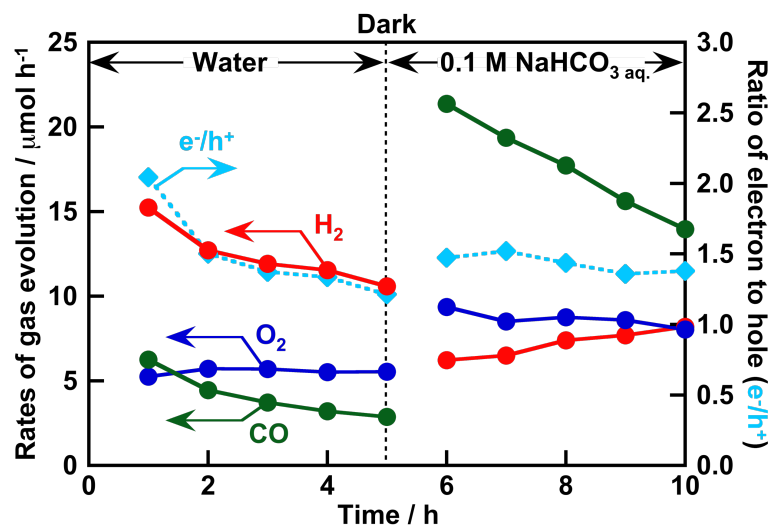

**Figure S6.** Rates of gas evolutions in  $\text{CO}_2$  reduction using water as an electron donor over Ag(3 wt%)-loaded  $\text{AgSr}_2\text{Ta}_5\text{O}_{15}$  photocatalyst. Photocatalyst: 0.5 g, Reactant solution: water (350 mL), Reactor: a gas-flow system with an inner irradiation cell made of quartz, Light source: a 400 W high-pressure mercury lamp, Concentration of an aqueous  $\text{NaHCO}_3$  solution:  $0.1 \text{ mol L}^{-1}$ .  $(e^-/h^+) = [(\text{sum of } \text{H}_2 \text{ and } \text{CO} \text{ formation rates}) \times 2] / [(\text{the } \text{O}_2 \text{ formation rate}) \times 4]$ . This result is the same as Figure 3 on the main text.

## References

- (1) T. Takayama, A. Iwase, A. Kudo, *Bull. Chem. Soc. Jpn.* **2015**, 88, 538.
- (2) M. D. Segall, P. J. D. Lindan, M. J. Probert, C. J. Pickard, P. J. Hasnip, S. J. Clark, and M. C. Payne, *J. Phys.: Condens. Mat.*, 2002, **14**, 2717.
- (3) D. Vanderbilt, *Phys. Rev. B*, 1990, **41**, 7892.
- (4) J. A. White, and D. M. Bird, *Phys. Rev. B*, 1994, **50**, 4954.
- (5) J. P. Perdew, K. Burke, and M. Ernzerhof, *Phys. Rev. Lett.*, 1996, **77**, 3865.
- (6) H. J. Monkhorst, and J. D. Pack, *Phys. Rev. B*, 1976, **13**, 5188.
- (7) D. Packwood, J. Kermode, L. Mones, N. Bernstein, J. Woolley, N. Gould, C. Ortner, and G. Csányi, *J. Chem. Phys.*, 2016, **144**, 164109.
- (8) J. Heyd, G. E. Scuseria, M. Ernzerhof, *J. Chem. Phys.*, 2003, **118**, 8207.
- (9) J. Heyd, G. E. Scuseria, M. Ernzerhof, *J. Chem. Phys.*, 2006, **124**, 219906.
- (10) J. Paier, M. Marsman, K. Hummer, G. Kresse, I. C. Gerber, J. G. Angyan, *J. Chem. Phys.*, 2006, **125**, 249901.
- (11) Y. Xu, M. Yamazaki, and P. Villars, *Jpn. J. Appl. Phys.*, 2011, **50**, 11RH02.
- (12) K. Momma, and F. Izumi, *J. Appl. Crystallogr.*, 2011, **44**, 1272.
